# Supplementary material
Source: PubMed Central journal article supplement (PMC3837970)
Supplement: IAI.01026-13_zii999090412so1.pdf [file IAI.01026-13_zii999090412so1.pdf]

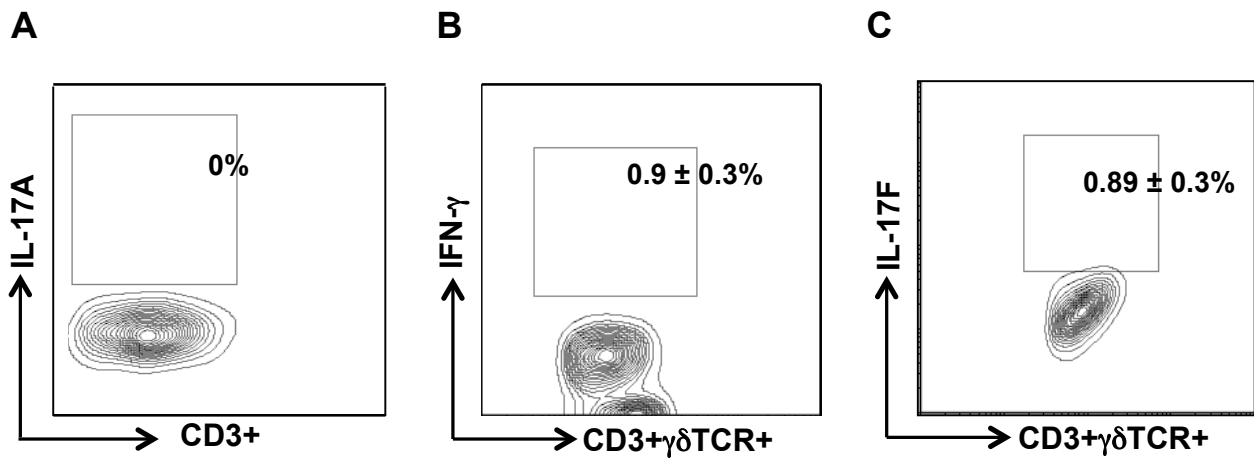

**Supplementary Figure 1.  $\gamma\delta$ T cells do not produce IFN- $\gamma$  or IL-17F at the *S. aureus* surgical wound site**

*S. aureus* surgical wounds were established in WT mice and PBS was administered to the wounds. Wound tissues were excised on day 3 and the percentage of CD3<sup>+</sup>IL-17<sup>+</sup>T cells determined by flow cytometry. Representative FACS plot for n=4 individual mice shown (A). Surgical wounds were also established in WT mice and infected with *S. aureus* strain PS80 (10<sup>2</sup> CFU). Wound tissues were excised on day 3 and the percentage of  $\gamma\delta$ TCR<sup>+</sup>IFN- $\gamma$ <sup>+</sup> (B) and  $\gamma\delta$ TCR<sup>+</sup>IL-17F<sup>+</sup> (C) T-cells determined by flow cytometry. Representative FACS plot for n=3-10 individual mice shown.

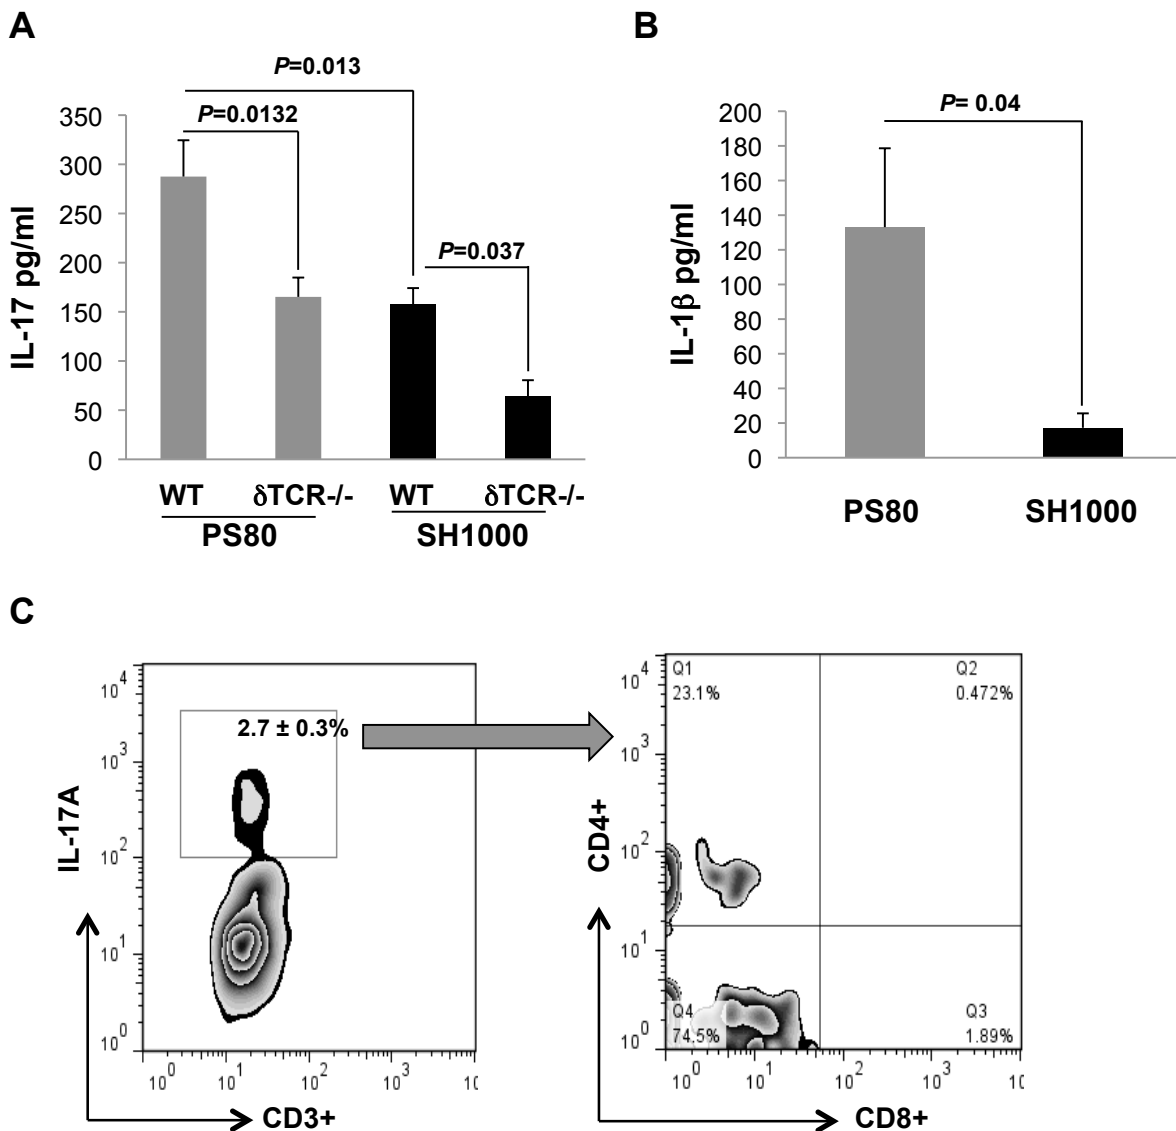

**Supplementary Figure 2. *S. aureus* strains PS80 and SH1000 differentially induce IL-1 $\beta$  production and IL-17 production from  $\gamma\delta$ T-cells during peritoneal infection.**

Peritoneal infection was established in WT and  $\delta$ TCR<sup>-/-</sup> mice by i.p injection of *S. aureus* strains PS80 (10<sup>8</sup> CFU) or SH1000 (10<sup>8</sup> CFU). The peritoneal cavity was lavaged with sterile PBS at 3 hours post infection and the levels of secreted IL-17 (A) and IL-1 $\beta$  (B), measured by ELISA. Results are expressed as the mean  $\pm$  SEM, n=10 individual mice. The proportions of CD3<sup>+</sup>IL-17<sup>+</sup> T-cells infiltrating the peritoneal cavity in  $\delta$ TCR<sup>-/-</sup> mice at 3 hours post infection were assessed. The cellular source of this IL-17 was then assessed by gating on CD3<sup>+</sup>IL-17<sup>+</sup> T-cells and assessing CD4 and CD8 expression by these cells (C).

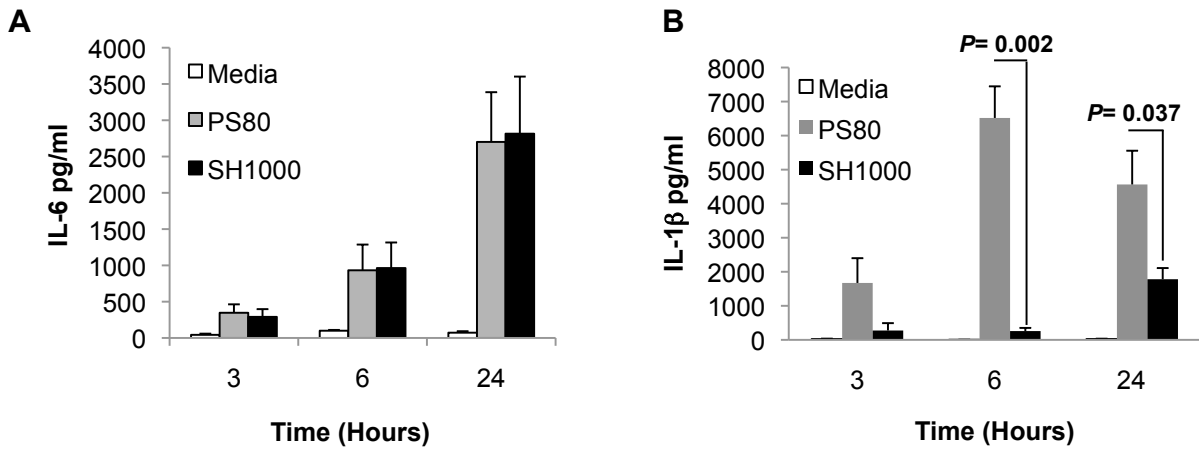

**Supplementary Figure 3. Strain dependent activation of IL-6 production by BMDCs and IL-1 $\beta$  production by peritoneal macrophages**

BMDCs from WT mice were infected with *S. aureus* strains PS80 or SH1000 at MOI 100 for 3, 6 and 24 hours. IL-6 levels in the supernatant were quantified by ELISA (A). Results expressed as mean  $\pm$  SEM, n=6 individual experiments. Primary peritoneal macrophages ( $2 \times 10^5$ ) were infected with *S. aureus* strains PS80 or SH1000 at MOI 100 for 24 hours. IL-1 $\beta$  levels in the supernatant were quantified by ELISA (B). Results expressed as mean  $\pm$  SEM, n=5 individual experiments.

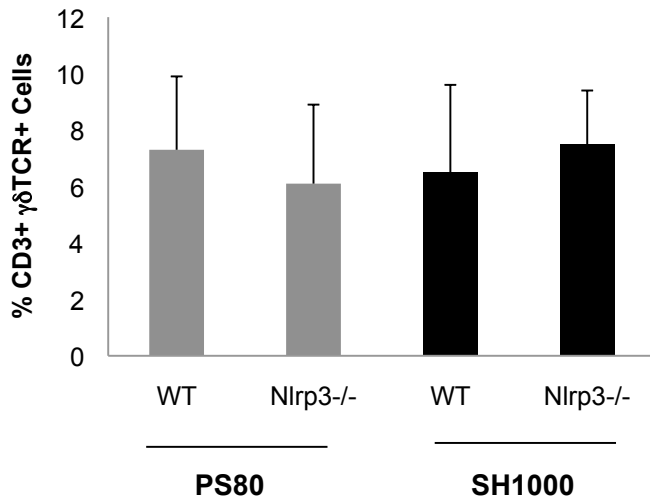

**Supplementary Figure 4. *S. aureus* strains PS80 and SH1000 recruit comparable levels of  $\gamma\delta$ T-cells to the SSI in WT and Nlrp3<sup>-/-</sup> mice.**

*S. aureus* surgical wounds were established in WT and Nlrp3<sup>-/-</sup> mice with either *S. aureus* strain PS80 (10<sup>2</sup> CFU) or SH1000 (10<sup>2</sup> CFU). Wound tissues were excised on days 3 post infection and the proportions of CD3<sup>+</sup> $\gamma\delta$ TCR<sup>+</sup> T-cells infiltrating the wound site evaluated by FACS. Results are expressed as the mean  $\pm$  SEM, n=4 individual mice
